# Supplementary material for: The identification and characterization of the p.G91 deletion in CRYBA1 in a Chinese family with congenital cataracts
Source: Springer Nature journal article supplement (doi:10.1186/s12881-019-0882-z), 2019-09-05
Supplement: MOESM2 [file 17142764]

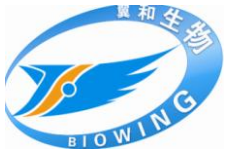

上海翼和应用生物技术有限公司  
BOWING BIOTECHNOLOGY Co. LTD

*Your Intimate Partner in Bioscience!*

# Cell Line Authentication Report

## STR Profiling

Sample Type: Cell Line

Sample from: Eye & Ent Hospital Of Fudan  
University

Testing Method: STR Genotyping

Report Time: May16, 2017

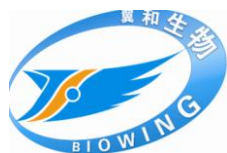

上海翼和应用生物技术有限公司  
BIOWING BIOTECHNOLOGY Co. LTD

*Your Intimate Partner in Bioscience!*

## COMPANY STATEMENT

1. THIS REPORT IS ONLY RESPONSIBLE FOR THE SAMPLES ANALYZED.
2. THE TESTING RESULTS AND THE ORGANIZATION NAME WILL NOT BE USED FOR ADVERTISEMENT, COMMERCIAL EXHIBITIONS, COMMERCIAL PERFORMANCE AND OTHER COMMERCIAL ACTIVITIES.
3. OBJECTIONS SHOULD BE RAISED WITHIN FIFTEEN DAYS AFTER THE RECEIPT OF THIS REPORT.
4. THE PAPER REPORT WITH CONTENT ALTERING, ADDING OR WITHOUT THE STAMPED SEAL OF THE COMPANY ARE INVALID.

**Testing Company:** Shanghai Biowing Applied Biotechnology Co. Ltd

**Address:** Room 4F, 8 th Buiding,Guiguo Garden,NO.471 Guiping Road,Caohejing Development Zone,Shanghai

**Tel:** +86-021-33559491

**Contact:** YiQun Chen

**E-mail:** biowing@vip.163.com



## Cell Line Authentication – STR Profiling Report

---

Sample code

Table 1. Sample Code

| Customer's code | Company Code |
|-----------------|--------------|
| B3              | 20170508     |

Sample Number: 1

Sample Type: Cell line

Testing Type: STR

Sample From: Eye & Ent Hospital Of Fudan University

Testing Method:

DNA was extracted by a commercial kit from CORNING (AP-EMN-BL-GDNA-250G). The twenty STRs including Amelogenin locus were amplified by six multiplex PCR and separated on ABI 3730XL Genetic Analyzer. The signals were then analyzed by the software GeneMapper.

Data Interpretation:

Cell lines were authenticated using Short Tandem Repeat (STR) analysis as described in 2012 in ANSI Standard (ASN-0002) by the ATCC Standards Development Organization (SDO) and in Capes-Davis et al., Match criteria for human cell line authentication: Where do we draw the line? Int J Cancer.2013;132(11):2510-9.

Test Results:

### 1. Result

Table 2. Matching information on the cell lines

| Sample Code | Multi-allele | Cell line matched | Cell Bank | EV | Percentage |
|-------------|--------------|-------------------|-----------|----|------------|
| 20170508    | Yes          | SRA 01/04         | DSMZ      | 1  | 9/9        |

- **Multi-allele means some STR contain more than two loci.**
-



## 2. Sample Description

20170508:

A. The STR results showed that multiple alleles were found in this cell line, and no cross contamination of human cells was found in the cell line.

B. The DNA of the cell lines found to perfect match the type of cell lines in a cell line retrieval, DSMZ database shows that cells called **SRA 01/04**, corresponding to the cell number **RCB1591**.

| Cell No.                 | Cell name | Locus names |         |            |         |        |      |      |      |            |
|--------------------------|-----------|-------------|---------|------------|---------|--------|------|------|------|------------|
|                          |           | D5S818      | D13S317 | D7S820     | D16S539 | VWA    | TH01 | AM   | TPOX | CSF1PO     |
| <i>Query (Your Cell)</i> |           | 11, 12, 13  | 10, 10  | 10, 11, 13 | 10, 10  | 17, 20 | 6, 7 | x, y | 8, 8 | 11, 13, 15 |
| RCB1591                  | SRA 01/04 | 11, 12, 13  | 10, 10  | 10, 11, 13 | 10, 10  | 17, 20 | 6, 7 | X, Y | 8, 8 | 11, 13, 15 |

## 3. Genotyping Result

Table 3. STR and Amelogenin Genotyping Results of Cell line 20170508

| Marker  | Sample  |         |         |         | Cell Bank information |         |         |
|---------|---------|---------|---------|---------|-----------------------|---------|---------|
|         | Allele1 | Allele2 | Allele3 | Allele4 | Allele1               | Allele2 | Allele3 |
| D5S818  | 11      | 12      | 13      |         | 11                    | 12      | 13      |
| D13S317 | 10      | 10      |         |         | 10                    | 10      |         |
| D7S820  | 10      | 11      | 13      |         | 10                    | 11      | 13      |
| D16S539 | 10      | 10      |         |         | 10                    | 10      |         |
| VWA     | 17      | 20      |         |         | 17                    | 20      |         |
| TH01    | 6       | 7       |         |         | 6                     | 7       |         |
| AMEL    | X       | Y       |         |         | X                     | Y       |         |
| TPOX    | 8       | 8       |         |         | 8                     | 8       |         |
| CSF1PO  | 11      | 13      | 15      |         | 11                    | 13      | 15      |
| D12S391 | 19      | 22      |         |         |                       |         |         |
| FGA     | 20      | 22.2    |         |         |                       |         |         |
| D2S1338 | 23      | 24      |         |         |                       |         |         |
| D21S11  | 27      | 28      |         |         |                       |         |         |
| D18S51  | 13      | 13      |         |         |                       |         |         |
| D8S1179 | 14      | 15      |         |         |                       |         |         |
| D3S1358 | 14      | 15      |         |         |                       |         |         |
| D6S1043 | 16      | 18      |         |         |                       |         |         |
| PENTAE  | 7       | 21      |         |         |                       |         |         |
| D19S433 | 13      | 14      |         |         |                       |         |         |
| PENTAD  | 9       | 12      | 13      |         |                       |         |         |

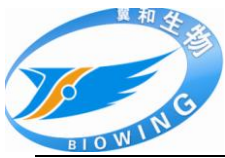

Others:

1. Genotyping Strategy and Site Distribution

Attached Table. Experimental Strategy and Sites

|   | <b>Strategy 1</b> | <b>Strategy 2</b> | <b>Strategy 3</b> | <b>Strategy 4</b> | <b>Strategy 5</b> | <b>Strategy 6</b> |
|---|-------------------|-------------------|-------------------|-------------------|-------------------|-------------------|
| 1 | TH01              | AMEL              | TPOX              | D3S1358           | PENTAE            | D19S433           |
| 2 | D12S391           | D5S818            | VWA               | D13S317           |                   | PENTAD            |
| 3 | D7S820            | D2S1338           | D8S1179           | D6S1043           |                   |                   |
| 4 | CSF1PO            | D21S11            |                   | D16S539           |                   |                   |
| 5 | FGA               | D18S51            |                   |                   |                   |                   |

*The allele match algorithm compares the 8 core loci plus amelogenin only, even though alleles from all loci will be reported when available.*

2. DSMZ tools was used to carry on the cell line comparison, which contains 2455 cell lines STR data from ATCC, DSMZ, JCRB ,ECACC, GNE and RIKEN databases. If the cell is not included in the above cell library, users need to compared with other databases.

---

Technician: Menglu Shen

Check: Yang Bai

Person in Charge: Yiqun Chen

Issue date: May16, 2017, 2017
